# Supplementary material for: Towards better understanding of C60organosols
Source: Royal Society of Chemistry journal article supplement (doi:10.1039/c5cp06806a), 2015-12-08
Supplement: c5cp06806a1.pdf [file c5cp06806a1.pdf]

SUPPORTING INFORMATION to the paper

**Toward the better understanding of C<sub>60</sub> organosols**

Nikolay O. Mchedlov-Petrosyan, Nika N. Kamneva, Younis T. M. Al-Shuuchi, Andriy I. Marynin,  
Olexiy S. Zozulia, Alexander P. Kryshstal, Vladimir K. Klochkov, Sergey V. Shekhovtsov

**Some examples of the re-charging of C<sub>60</sub> colloidal species in CH<sub>3</sub>CN**

It should be noted that, the re-charging begins even in extremely diluted solutions of acids and calcium perchlorate and the coagulation. The systems with the re-charged colloidal species are shown in Figures 1–3. In entire acetonitrile, the  $pK_a$  values for HClO<sub>4</sub> and CF<sub>3</sub>SO<sub>3</sub>H are 1.57 and 2.60, respectively.<sup>1</sup>

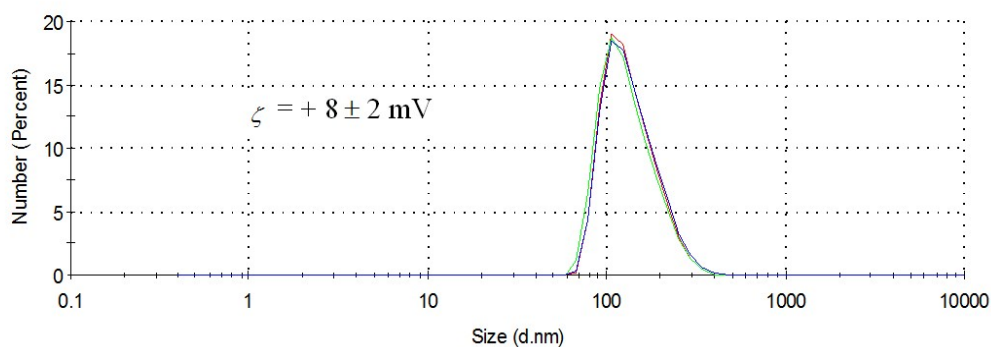

**Figure 1.** Acetonitrile with 1 vol. % toluene, C<sub>60</sub>:  $4 \times 10^{-6}$  M, 0.01 mM Ca(ClO<sub>4</sub>)<sub>2</sub>.

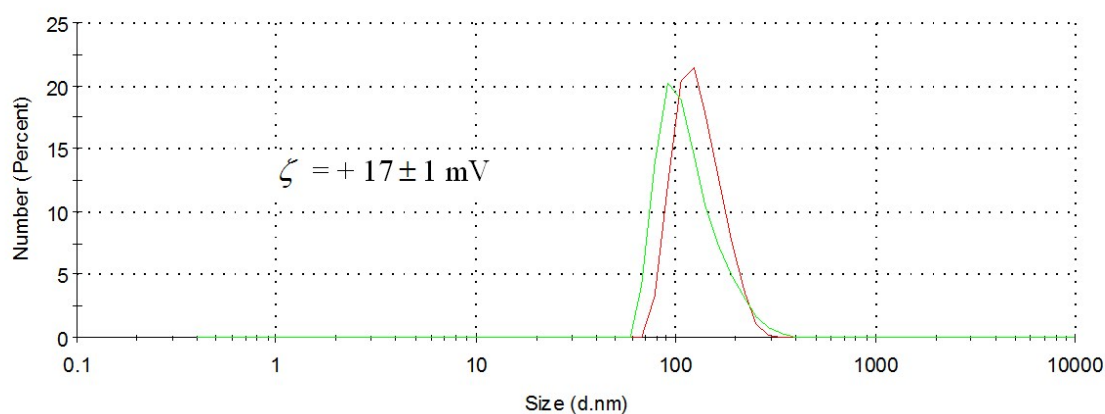

**Figure 2.** Acetonitrile with 1 vol. % toluene, C<sub>60</sub>:  $4 \times 10^{-6}$  M, 0.01 mM HClO<sub>4</sub>.

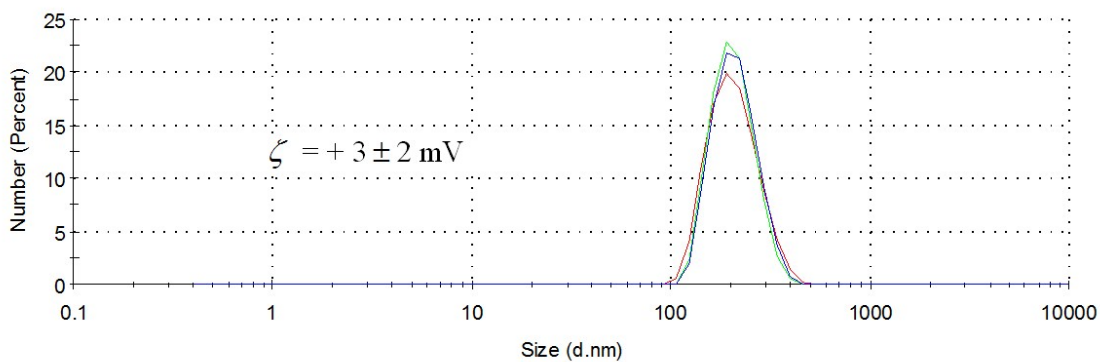

**Figure 3.** Acetonitrile with 1 vol. % toluene, C<sub>60</sub>: 4 × 10<sup>-6</sup> M, 0.01 mM CF<sub>3</sub>SO<sub>3</sub>H.

Figures 4 and 5 demonstrate the rise in the size of fullerene colloidal species, which are re-charged in 0.15 mM CF<sub>3</sub>SO<sub>3</sub>H; ζ = + 29 ± 7 mV.

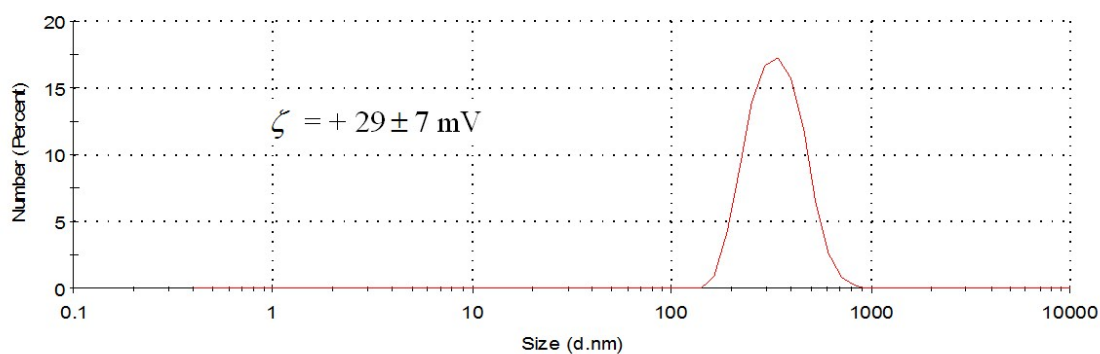

**Figure 4.** Acetonitrile with 1 vol. % toluene, C<sub>60</sub>: 4 × 10<sup>-6</sup> M, 0.15 mM CF<sub>3</sub>SO<sub>3</sub>H (starting conditions).

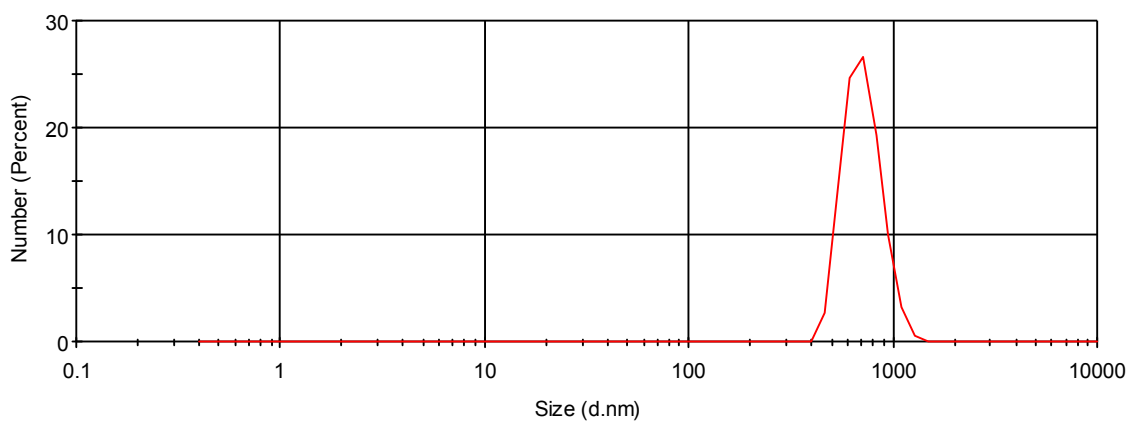

**Figure 5.** Size increase in time: the same organosol (Figure 4) after 20 minutes.

Normally, the C<sub>60</sub> colloids re-charged by acids are unstable in time, exhibiting growth of the particles.

## Experiments with the C<sub>60</sub> sol prepared using Deguchi's hand-grinding technique

Some experiments have been made with the C<sub>60</sub> colloid in acetonitrile prepared following the Deguchi's procedure of hand-grinding in an agate mortar, with further sonication.<sup>2</sup> The latter was carried out with 15–30 min time intervals. The particle size was determined by DLS technique:  $273 \pm 5$  nm (by number),  $296 \pm 8$  nm (by volume), and  $280 \pm 5$  nm (by intensity); PDI =  $0.264 \pm 0.009$ ;  $\zeta = -31.0 \pm 1.2$  mV. If the ultrasound treatment was permanent, somewhat smaller species were obtained. The TEM data are exemplified below (Figure 6). The species are as a rule more monolithic as compared with the sol obtained via the dilution of toluene solution by acetonitrile.

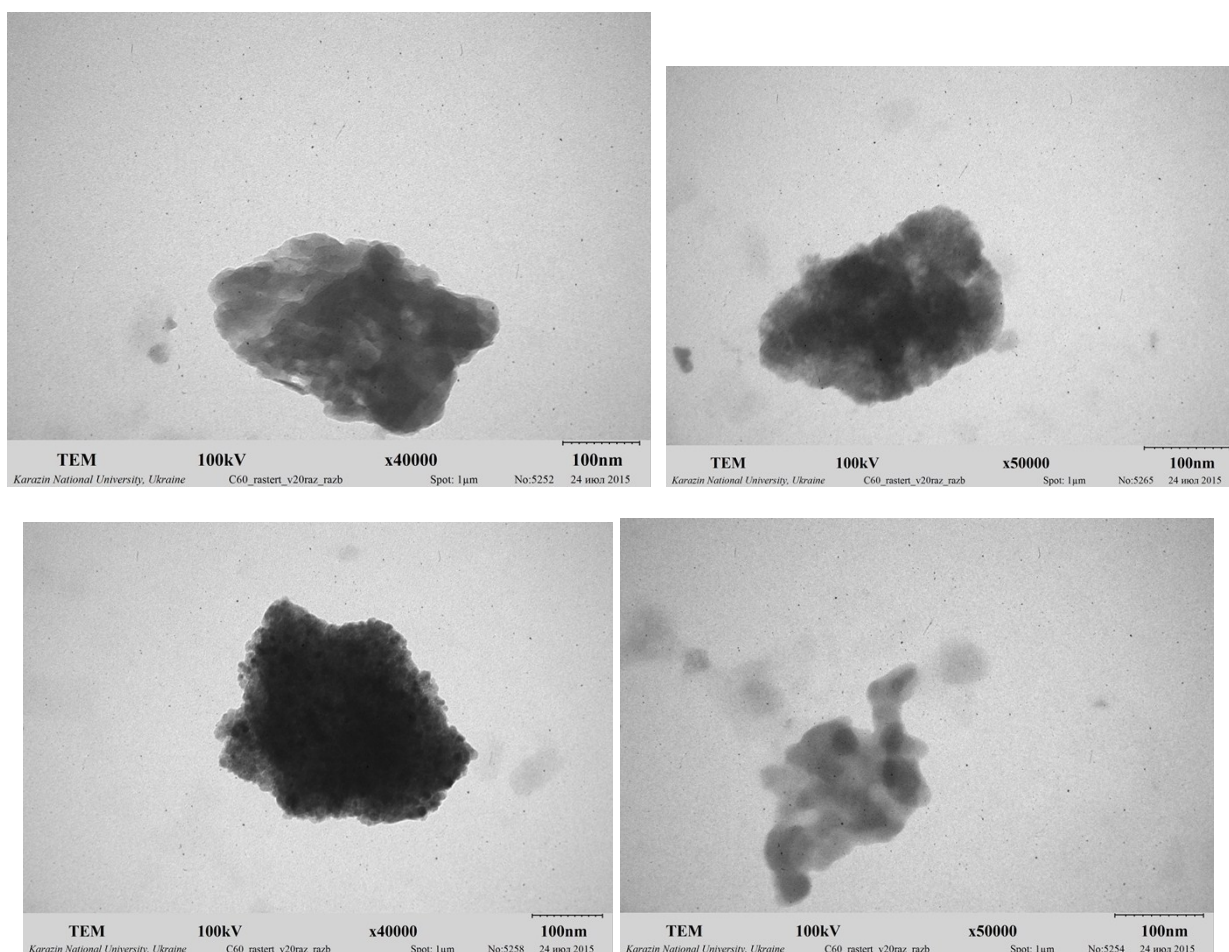

**Figure 6.** The TEM images of the colloidal particles, which were obtained by hand-grinding.

If the organosol has been prepared with acetonitrile which contained ionol, the zeta-potential was substantially less negative,  $\zeta \approx -7$  mV.

**The primary electrospray data** for the C<sub>60</sub> sol in acetonitrile–benzene (1 : 1 by volume) are given below; fullerene concentration  $4.0 \times 10^{-5}$  M.

## The electrospray data

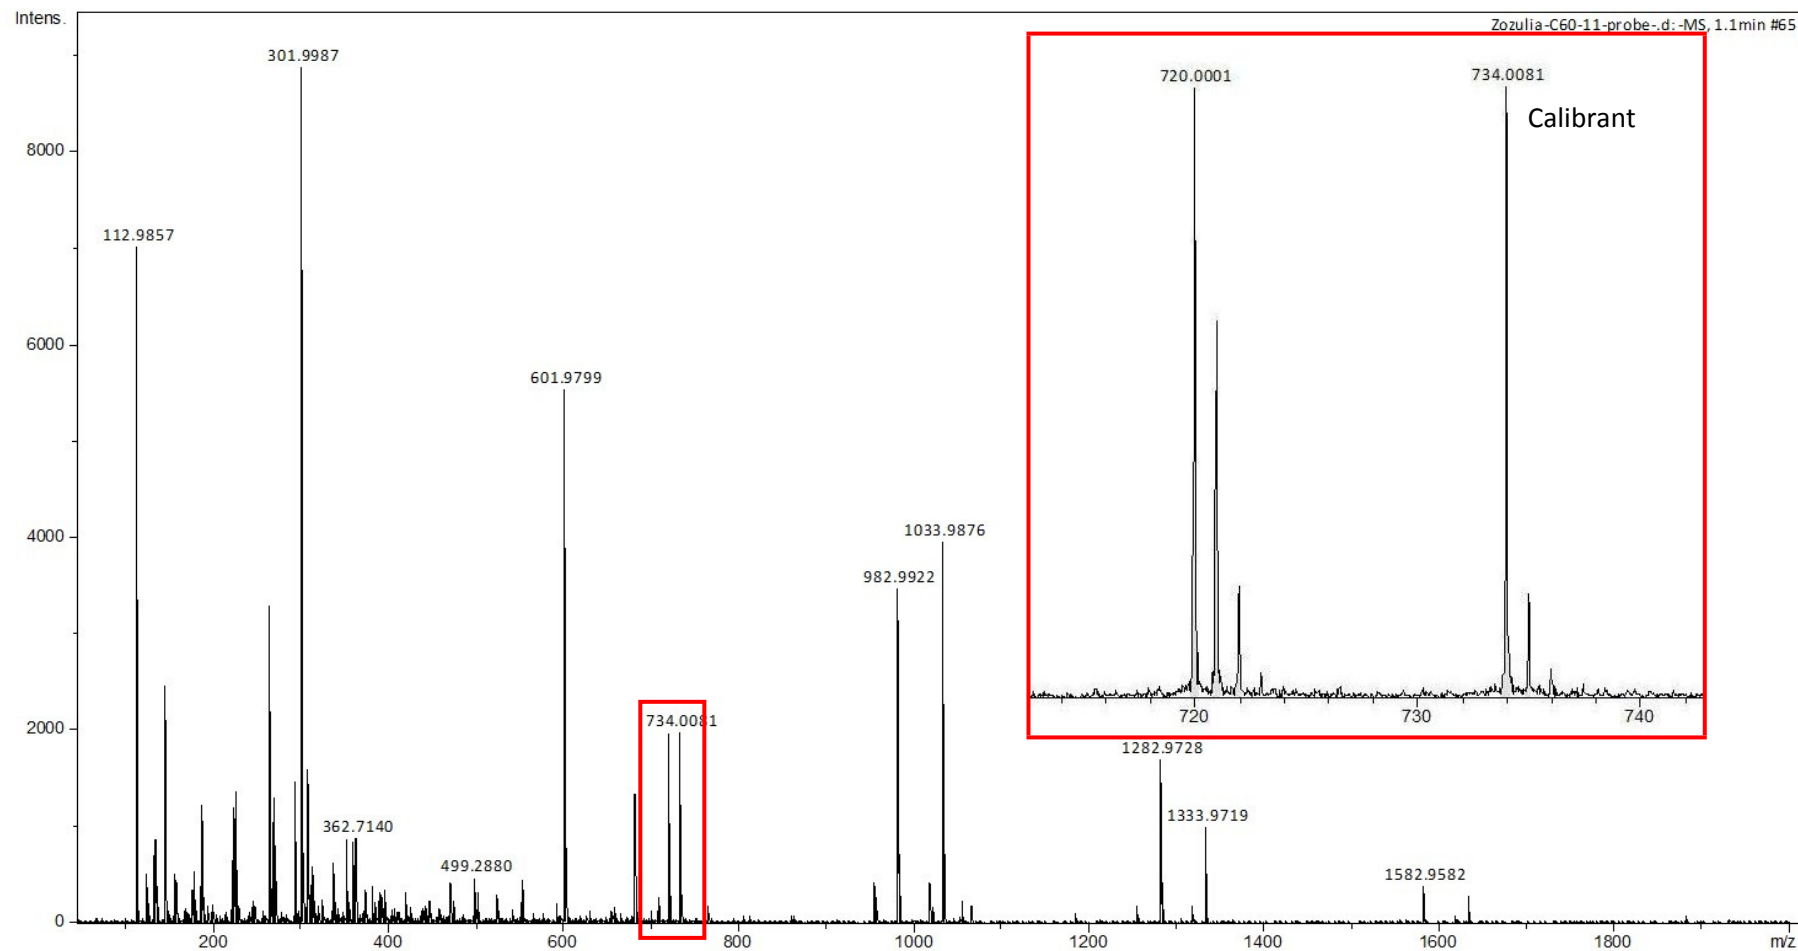

**Figure 7.** The  $C_{60}$  sol in acetonitrile–benzene (1 : 1 by volume) are given below; fullerene concentration  $4.0 \times 10^{-5}$  M.

## Other solvent systems

The  $C_{60}$  organosols in other solvents exhibit as a rule a higher polydispersity and a less negative zeta-potential as compared with the colloid systems in acetonitrile and acetonitrile – benzene mixed solvent.

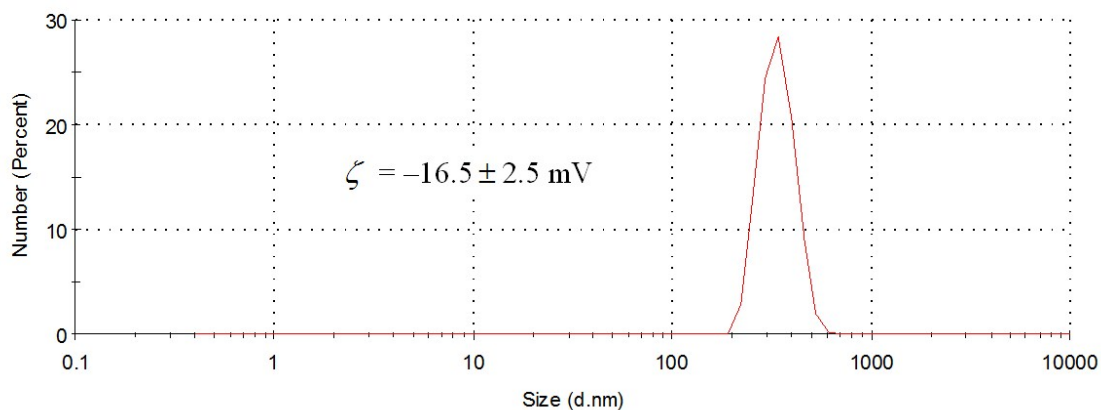

**Figure 8.** The  $C_{60}$  sol in toluene + DMSO mixed solvent, 1:1 by volume; fullerene concentration  $3.4 \times 10^{-5}$  M.

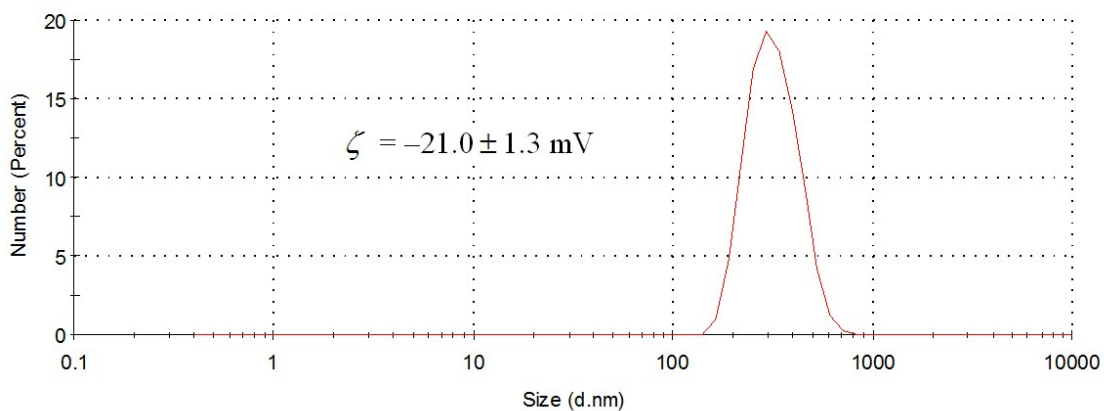

**Figure 9.** The  $C_{60}$  sol in methanol with 1 vol. % toluene; fullerene concentration  $4 \times 10^{-6}$  M.

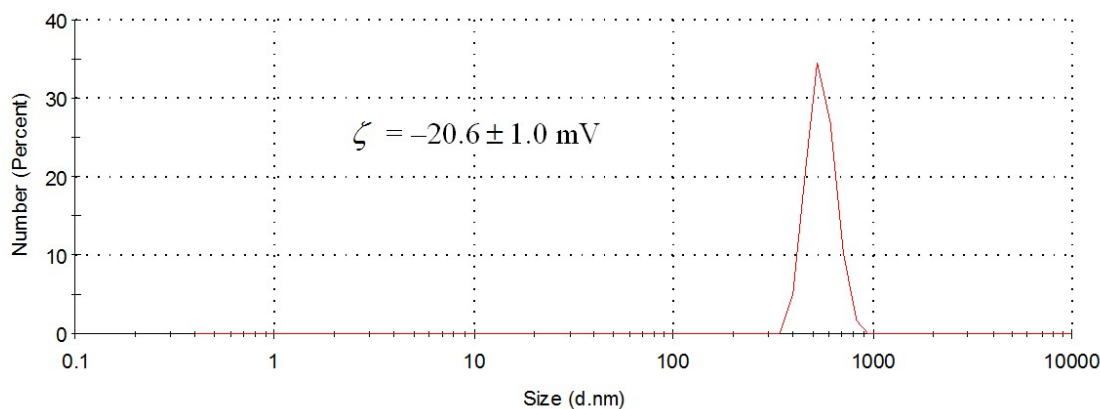

**Figure 10.** The same sol (Figure 9), but with 0.01 M 2,6-di-tert-butyl-4-methylphenol; 1 h 18 min after preparation: rise in size without changes in the zeta-potential.

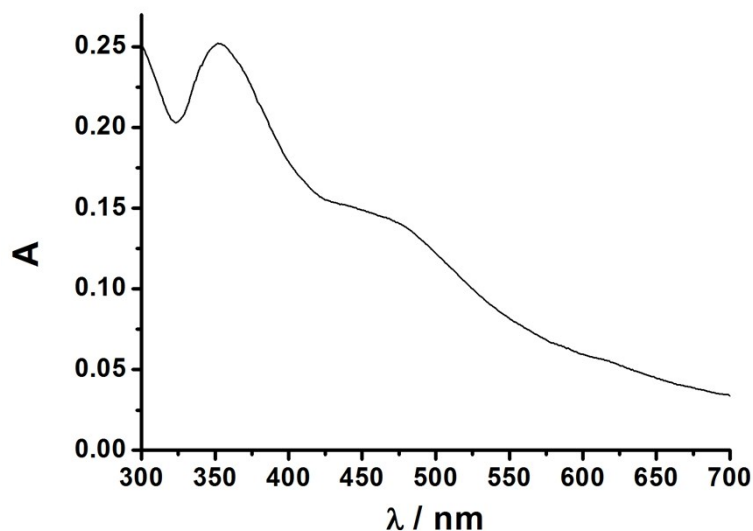

**Figure 11.** UV-visible absorption of  $4 \times 10^{-6}$  M  $C_{60}$  sol in methanol with 1 vol. % toluene; optical path 1.00 cm.

### Calculations of the surface charge density

The interfacial electrostatic potential,  $\Psi$ , of the colloidal species is determined by the surface charge density and the ionic strength of the bulk. Though  $|\Psi| > |\zeta|$ , for the relatively low-charged species the experimentally available zeta-potential may be used as the interfacial one in order to estimate the value of the surface charge density,  $q_s$ . For such calculations, the Ohshima – Healy – White equations for spherical and cylindrical particles<sup>3</sup> may be used:

$$q_s(\text{sphere}) = \frac{2\varepsilon\varepsilon_0\kappa RT}{F} \sinh(Y/2) \left( 1 + \frac{2}{\kappa r \cosh^2(Y/4)} + \frac{8 \ln[\cosh(Y/4)]}{(\kappa r)^2 \sinh^2(Y/2)} \right)^{\frac{1}{2}};$$

$$q_s(\text{cylinder}) = \frac{2\varepsilon\varepsilon_0\kappa RT}{F} \sinh(Y/2) \left( 1 + \left( \frac{K_1^2(\kappa r)}{K_0^2(\kappa r)} - 1 \right) \frac{1}{\cosh^2(Y/4)} \right)^{\frac{1}{2}}.$$

Here,  $Y = \Psi F / RT$ ,  $F$  is the Faraday constant,  $\kappa$  is the reciprocal Debye length,  $r$  – radius of the particle,  $\varepsilon_0 = 8.854 \times 10^{-12}$  F m<sup>-1</sup>, and  $K_n(x)$  is the modified Bessel function of the second kind of order  $n$ . For acetonitrile at  $T = 298$  K,  $\varepsilon = 36$ .

For species with diameter of AE 200 nm, even the equation for the flat double electrical layer may be used. For example, the estimates of the surface charge  $q_s$  in 1:1 electrolyte solution of concentration  $c$ , M in acetonitrile have been processed using the following equation:

$$q_s = 0.49 \sqrt{c} \sinh \frac{\zeta}{51.38}$$

Here  $\Psi$  stands for the interfacial electrical potential, mV,  $q_s$  is expressed as charge per nm<sup>2</sup>. If the  $\zeta$  values are used for the NaClO<sub>4</sub> concentrations well below the CCC (which is around 0.1 mM), the mean value is  $|q_s| = 7.85 \times 10^{-4}$  elementary charges per nm<sup>2</sup>, i.e.,  $1.27 \times 10^3$  nm<sup>2</sup> per one charge.

In the Ca(ClO<sub>4</sub>)<sub>2</sub> solutions around 0.15 mM, the  $|\zeta|$  value of re-charged colloidal species of the fullerene are even higher than in extremely diluted NaClO<sub>4</sub> solutions. This gives evidence for a higher  $q_s$  value and is in line with the high CCC<sub>2</sub> value, necessary for the lowering of the potential barrier in terms of the DLVO theory.

## References

1. T. Fujinaga and I. Sakamoto, *Pure Appl. Chem.*, 1980, **52**, 1387–1396.
2. S. Deguchi and S.-a. Mukai, *Chem. Lett.* 2006, **35**, 396–397.
3. H. Ohshima, T. W. Healy and L. R. White, *J. Colloid Int. Sci.* 1982, **90**, 17–26.
